# Supplementary material
Source: PubMed Central journal article supplement (PMC4790671)
Supplement: bers007198.w2_default.pdf [file bers007198.w2_default.pdf]

## Appendix 2: Review protocols of study

| Component           | Description                                                                                                                                                                                                                                                                                                                                                                  |
|---------------------|------------------------------------------------------------------------------------------------------------------------------------------------------------------------------------------------------------------------------------------------------------------------------------------------------------------------------------------------------------------------------|
| Review question     | What is the clinical and cost effectiveness of different types of long-term intermittent urinary catheters (non-coated, hydrophilic or gel reservoir) on symptomatic urinary tract infections, bacteraemia, mortality, and patient preference?                                                                                                                               |
| Objectives          | To determine the most effective long term urinary intermittent catheter type to prevent infection.                                                                                                                                                                                                                                                                           |
| Population          | All patients with long term (>28days) urinary catheters <ul style="list-style-type: none"> <li>• Catheter subgroups include suprapubic and urethral</li> <li>• At risk groups may include immunocompromised patients</li> <li>• Patients with previous history of UTI</li> <li>• Patients undergoing/had orthopaedic surgery</li> </ul> Settings – primary care or community |
| Intervention        | Non-coated catheters (note: reusable up to 7 days)<br>Hydrophilic catheters (note: not reusable)<br>Catheters with gel reservoirs                                                                                                                                                                                                                                            |
| Comparison          | As above                                                                                                                                                                                                                                                                                                                                                                     |
| Outcomes            | Symptomatic UTI<br>Number (or average number) of symptomatic recurrent UTIs (within 3 months, 6 months or 1 year)<br>Bacteraemia<br>Number of catheters used per day/week<br>Mortality<br>Patient preference/ comfort<br>(secondary outcomes – blood in urine and pH changes)                                                                                                |
| Search strategy     | The databases to be searched are Medline, Embase, The Cochrane Library and CINAHL.<br>Randomised controlled trials (RCTs) will be considered. If no RCTs are found well conducted cohort studies and observational studies may also be considered.<br>Studies will be restricted to English language only<br>Databases will be searched from 2002.                           |
| The review strategy | Meta-analyses will be conducted where possible.<br>Only include hospital settings if no evidence is available from community settings. Only include intensive care settings if no other evidence is available from other hospital settings.<br>If there is heterogeneity the following subgroups will be analysed separately:<br>Age (adults, children)                      |

| Component           | Description                                                                                                                                                                                                                                                                                                                                                                                              |
|---------------------|----------------------------------------------------------------------------------------------------------------------------------------------------------------------------------------------------------------------------------------------------------------------------------------------------------------------------------------------------------------------------------------------------------|
| Review question     | In patients performing intermittent catheterisation, what is the clinical and cost effectiveness of non-coated catheters reused multiple times compared to single use on urinary tract infections, bacteraemia, mortality, and patient preference?                                                                                                                                                       |
| Objectives          | To determine the most effective long term urinary intermittent catheter type (non-coated reused multiple times vs single use) to prevent infection.                                                                                                                                                                                                                                                      |
| Population          | All patients with long term (>28days) urinary catheters <ul style="list-style-type: none"> <li>• Catheter subgroups include suprapubic and urethral</li> <li>• At risk groups may include immunocompromised patients</li> <li>• Patients with previous history of UTI</li> <li>• Patients undergoing/had orthopaedic surgery</li> </ul> Settings – primary care or community                             |
| Intervention        | Uncoated catheters – single use, disposable                                                                                                                                                                                                                                                                                                                                                              |
| Comparison          | Uncoated catheters – reusable (multi-use).                                                                                                                                                                                                                                                                                                                                                               |
| Outcomes            | Symptomatic UTI<br>Number (or average number) of symptomatic recurrent UTIs (within 3 months, 6 months or 1 year)<br>Bacteraemia<br>Mortality<br>Patient preference/ comfort<br>(secondary outcomes – blood in urine and pH changes)                                                                                                                                                                     |
| Search strategy     | The databases to be searched are Medline, Embase, The Cochrane Library and CINAHL.<br>Randomised controlled trials (RCTs) will be considered. If no RCTs are found, well conducted cohort studies and observational studies may also be considered.<br>Studies will be restricted to English language only<br>No date restriction will be applied. Databases will be searched from their date of origin. |
| The review strategy | Meta-analyses will be conducted where possible.<br>Only include hospital settings if no evidence is available from community settings. Only include intensive care settings if no other evidence is available from other hospital settings.<br>If there is heterogeneity the following subgroups will be analysed separately:<br>Age (adults, children)                                                  |
