# Supplementary material
Source: PubMed Central journal article supplement (PMC4790671)

**Appendix 3: Details of literature search and selection process in study**

**Fig 1. First search: What is the clinical and cost effectiveness of different types of long term urinary intermittent self catheters (non-coated, hydrophilic or gel reservoir) on urinary tract infections, bacteraemia, frequency of catheter change, encrustations and blockages, mortality, and patient preference?**

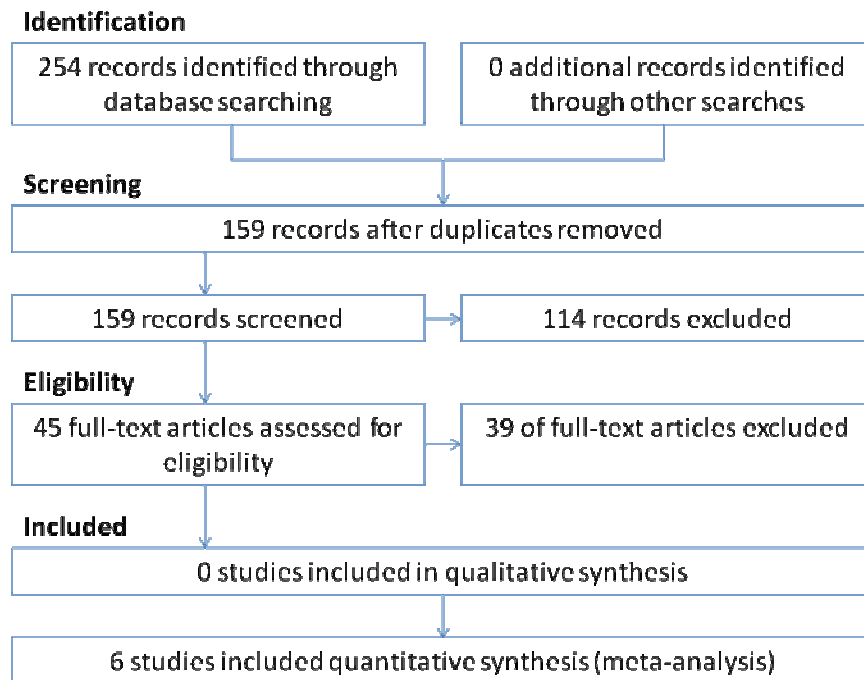

**Fig 2. Second search: what is the clinical and cost effectiveness of non-coated catheters reused multiple times compared to single-use on urinary tract infections, bacteraemia, frequency of catheter change, encrustations and blockages, mortality, and patient preference?**

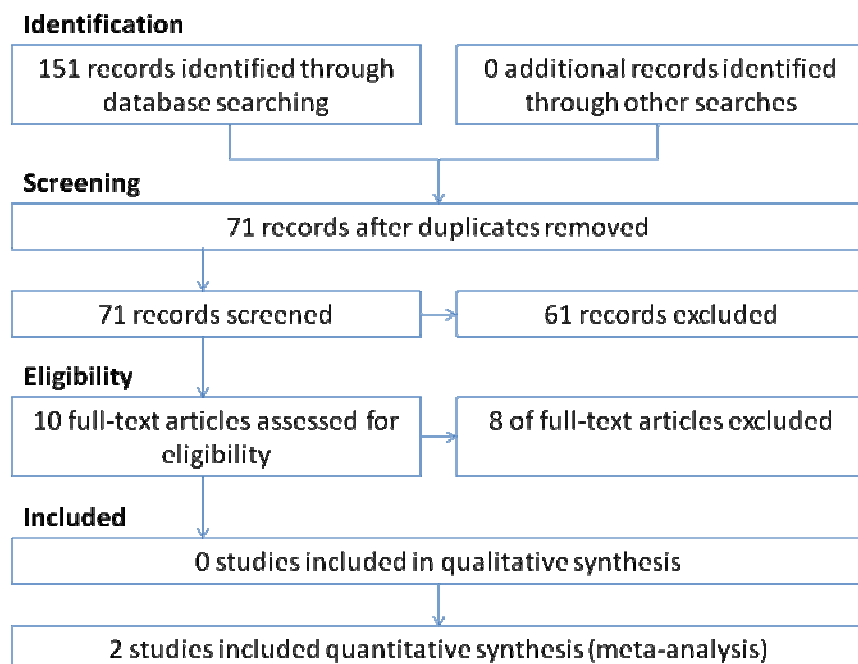

Supplement: bers007198.w3_default.pdf [file bers007198.w3_default.pdf]
